# Supplementary material
Source: PubMed Central journal article supplement (PMC2853261)
Supplement: NIHMS181302-supplement-supplement.pdf [file NIHMS181302-supplement-supplement.pdf]

# De Novo Self-Assembling Collagen Heterotrimers using Explicit Positive and Negative Design

Fei Xu, Lei Zhang, Ronald L. Koder, Vikas Nanda

## SUPPLEMENTARY DATA

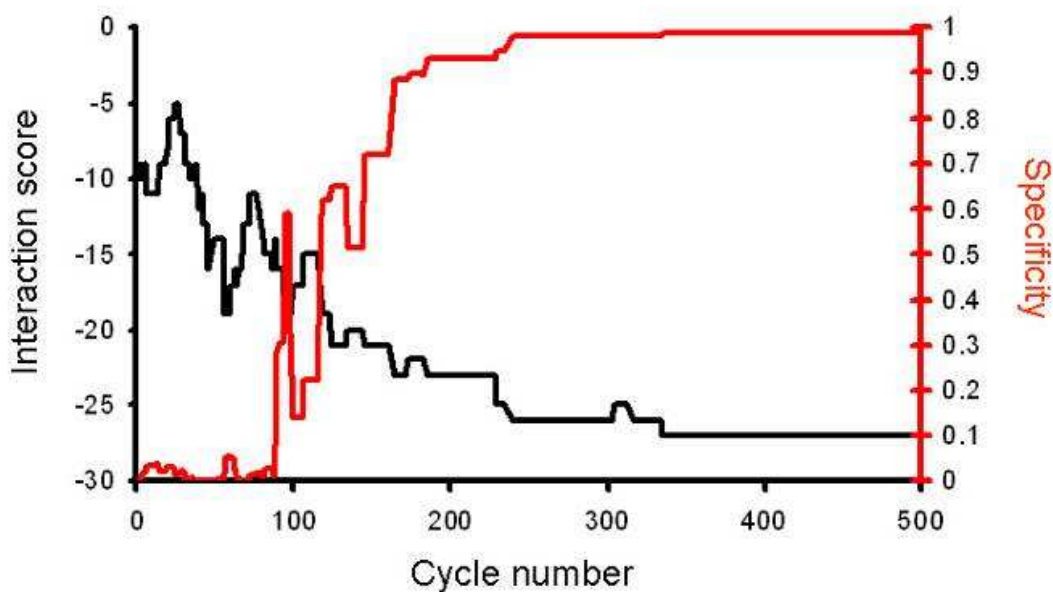

**Figure S1:** Trajectory of stability,  $E_{ABC}$ , and specificity,  $P_{ABC}$ , for a single optimization. Energies calculated using the sequence-based scoring function (Eq. 1).

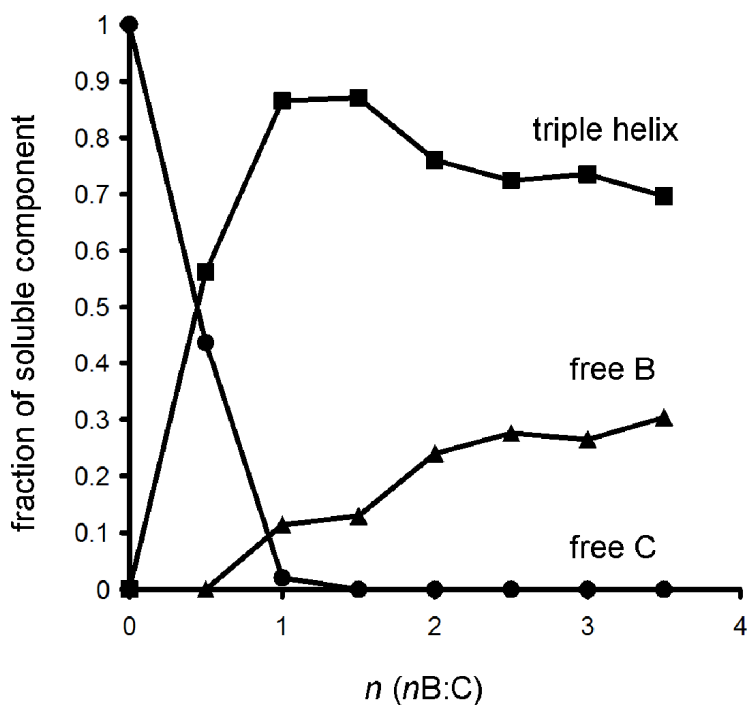

**Figure S2:** Separation of the  $nB:C$  Job plot (Figure 7B) into components for the triple-helix, B-type monomer and C-type monomer CD spectra. Using a conjugate gradient optimization, experimental spectra for each ratio  $n$  of  $nB:C$  were fit to  $\alpha_{helix}S_{helix} + \alpha_{freeB}S_{freeB} + \alpha_{freeC}S_{freeC}$ . 0.2 mM CD spectra for free B and C were used for  $S_{freeB}$  and  $S_{freeC}$ .  $(POG)_{10}$  was used for  $S_{helix}$ .  $\alpha$ 's were normalized to total soluble concentration.

**Table S1.** The top 5 sequences of chains A, B, and C (sorted by  $E_{GAP}$ ) from the simultaneous optimization of interaction score of species ABC and its specificity.

| Sequences                                                                                                       | $E_{ABC}$ | $E_{GAP}$ | Number of Glu | Number of Arg |
|-----------------------------------------------------------------------------------------------------------------|-----------|-----------|---------------|---------------|
| A: EOGROGPEGPEGPEGEEOGEOGPEGROGPRG<br>B: PEGEOGROGROGPRGPRGPRGROGROGPRG<br>C: PRGROGROGROGPRGEOGPEGPEGEEOGEOG   | -29       | 22        | 14            | 16            |
| A: PRGEOGROGROGPEGPEGEEOGEOGROGPRG<br>B: EOGPOGPEGEEOGPEGPRGPRGROGROGPRG<br>C: PEGPEGROGPRGROGPRGEOGPEGEEOGEOG  | -23       | 22        | 15            | 14            |
| A: ROGPRGPRGROGROGPEGEEOGPEGROGPRG<br>B: PRGEOGPEGPEGEEOGPRGPRGROGROGPRG<br>C: PRGEOGPEGROGPRGROGPEGPEGEEOGEOG  | -25       | 22        | 13            | 17            |
| A: PRGPRGPRGROGROGPRGEOGPEGEEOGEOG<br>B: EOGPRGPEGPEGPEGEEOGPEGROGPRGROG<br>C: PEGEOGPEGROGPRGPRGROGPRGEOGPEG   | -21       | 22        | 15            | 15            |
| A: PRGEOGPEGEEOGPEGROGPRGROGPEGEEOG<br>B: EOGPEGPRGPRGROGROGEOGPEGEEOGROG<br>C: PEGROGPRGPEGPEGEEOGPEGPRGROGEOG | -13       | 21        | 17            | 13            |

**Table S2.** Interaction scores using the structure-based model of all the species of peptides A, B, and C at pH 1.1.

| <b>Species</b> | <b>Interaction Scores</b> |
|----------------|---------------------------|
| AAA            | 0                         |
| BBB            | 10                        |
| CCC            | 8                         |
| ABB            | 2                         |
| BAB            | 8                         |
| BBA            | 4                         |
| AAB            | 0                         |
| ABA            | 2                         |
| BAA            | 2                         |
| BCC            | 4                         |
| CBC            | 4                         |
| CCB            | 4                         |
| BBC            | 2                         |
| CBB            | 2                         |
| BCB            | 6                         |
| ACC            | 4                         |
| CAC            | 2                         |
| CCA            | 4                         |
| AAC            | 2                         |
| ACA            | 2                         |
| CAA            | 2                         |
| ABC            | 2                         |
| ACB            | 0                         |
| BAC            | 4                         |
| BCA            | 2                         |
| CAB            | 2                         |
| CBA            | 2                         |
